# Supplementary material for: Life cycle assessment of New Jersey offshore wind
Source: Copernicus journal article supplement (doi:10.5194/wes-10-1389-2025), 2025-07-18
Supplement: Supplementary file 1 [file wes-10-1389-2025-supplement.pdf]

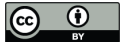

*Supplement of*

## **Life cycle assessment of New Jersey offshore wind**

**Meghann Smith et al.**

*Correspondence to:* Meghann Smith ([smithmeg@montclair.edu](mailto:smithmeg@montclair.edu))

The copyright of individual parts of the supplement might differ from the article licence.

# Supplementary Material

## S1. Explanation of impact categories

**Table S1. Description of ReCiPe 2016 midpoint and endpoint impact categories**

|                                         |                                                                                                                                                                                                                                                                                                                                          |
|-----------------------------------------|------------------------------------------------------------------------------------------------------------------------------------------------------------------------------------------------------------------------------------------------------------------------------------------------------------------------------------------|
| Midpoint impact categories              | Represents the environmental effects at an earlier stage in the cause-effect chain, focusing on specific, measurable impacts. These categories provide more detailed, robust indicators for specific environmental problems, making them useful for understanding the direct contributions of a process to various environmental issues. |
| Global warming                          | Reflects the potential for climate change due to greenhouse gas emissions, expressed in kg CO <sub>2</sub> eq (kilograms carbon dioxide equivalent).                                                                                                                                                                                     |
| Stratospheric ozone depletion           | Reflects the depletion of the ozone layer caused by substances like CFCs, expressed in kg CFC-11 eq (kilograms chloroflourocarbon-11 equivalent).                                                                                                                                                                                        |
| Ionizing radiation                      | Reflects potential health effects from exposure to ionizing radiation, expressed in kBq Co-60 eq (kilobecquerel Cobalt-60 equivalent).                                                                                                                                                                                                   |
| Ozone formation, Human health           | Reflects the formation of ground-level ozone and its impact on respiratory health, expressed in kg NO <sub>x</sub> eq (kilograms nitrogen oxides equivalent).                                                                                                                                                                            |
| Fine particulate matter formation       | Reflects the impact of fine particulate matter on human health, expressed in kg PM <sub>2.5</sub> eq (kilograms particulate matter 2.5 equivalent).                                                                                                                                                                                      |
| Ozone formation, Terrestrial ecosystems | Reflects the damage from ozone formation on plant life and growth, expressed in kg NO <sub>x</sub> eq (kilograms nitrogen oxides equivalent).                                                                                                                                                                                            |
| Terrestrial acidification               | Reflects the acidification of soils due to emissions like SO <sub>2</sub> , expressed in kg SO <sub>2</sub> eq (kilograms sulfur dioxide equivalent).                                                                                                                                                                                    |
| Freshwater ecotoxicity                  | Reflects nutrient pollution in freshwater systems leading to excessive plant growth, expressed in kg P eq (kilograms phosphorus equivalent).                                                                                                                                                                                             |
| Marine ecotoxicity                      | Reflects nutrient pollution in marine ecosystems, expressed in kg N eq (kilograms nitrogen equivalent).                                                                                                                                                                                                                                  |
| Human carcinogenic toxicity             | Reflects cancer risks from chemical exposure, expressed in kg 1,4-DCB (1,4-dichlorobenzene).                                                                                                                                                                                                                                             |
| Human non-carcinogenic toxicity         | Reflects non-cancer health impacts from chemicals, expressed in kg 1,4-DCB (1,4-dichlorobenzene).                                                                                                                                                                                                                                        |
| Land use                                | Reflects the impact of land occupation and transformation on biodiversity, expressed in m <sup>2</sup> a crop eq (square meters of land used annually for crops equivalent).                                                                                                                                                             |
| Mineral resource scarcity               | Reflects the depletion of mineral resources, expressed in kg Cu eq (kilograms copper equivalent).                                                                                                                                                                                                                                        |
| Fossil resource scarcity                | Reflects the depletion of fossil fuel resources, expressed in kg oil eq (kilograms oil equivalent).                                                                                                                                                                                                                                      |
| Water consumption                       | Reflects freshwater usage impacts, expressed in m <sup>3</sup> (cubic meters).                                                                                                                                                                                                                                                           |
| Endpoint impact categories              |                                                                                                                                                                                                                                                                                                                                          |
| Human health                            | Reflects the overall health damage due to pollutants, expressed in DALYs (disability-adjusted life years).                                                                                                                                                                                                                               |
| Ecosystems                              | Reflects biodiversity loss and ecosystem damage, expressed in species.year (species per year).                                                                                                                                                                                                                                           |
| Resources                               | Reflects long-term economic impact due to depletion of resources, expressed in USD <sub>2013</sub> (United States Dollar 2013).                                                                                                                                                                                                          |

## S2. Life Cycle Inventory

### S2.1. Raw material supply

Table S2. LCI – IEA Wind 15-MW Turbine

| Units for OSWF | Component                     | Weight per unit (tons) | Process                                                                                                                                                   |
|----------------|-------------------------------|------------------------|-----------------------------------------------------------------------------------------------------------------------------------------------------------|
| 105            | Tower + monopile              | 2178                   |                                                                                                                                                           |
|                | Low-alloyed steel             | 2069.1                 | Steel, low-alloyed, hot rolled {GLO}   market for steel, low-alloyed, hot rolled   Cut-off, U                                                             |
|                | Aluminum                      | 30.492                 | Aluminium, primary, ingot {IAI Area, North America}   market for aluminium, primary, ingot   Cut-off, U                                                   |
|                | Copper                        | 8.712                  | Copper, cathode {GLO}   market for copper, cathode   Cut-off, U                                                                                           |
|                | Plastic (PET)                 | 30.492                 | Polyethylene, high density, granulate {US}   polyethylene, high density, granulate, recycled to generic market for high density PE granulate   Cut-off, U |
|                | Electronics for control units | 30.492                 | Electronics, for control units {GLO}   market for electronics, for control units   Cut-off, U                                                             |
|                | Lubricating oil               | 8.712                  | Lubricating oil {RoW}   market for lubricating oil   Cut-off, U                                                                                           |
| 105            | Nacelle                       | 449.20                 |                                                                                                                                                           |
|                | Yaw system, ball bearing      | 95.00                  | Steel, low-alloyed, hot rolled {GLO}   market for steel, low-alloyed, hot rolled   Cut-off, U                                                             |
|                | Yaw system, drive + brake     | 5.00                   | Steel, low-alloyed, hot rolled {GLO}   market for steel, low-alloyed, hot rolled   Cut-off, U                                                             |
|                | Hub                           | 190.00                 | Steel, chromium steel 18/8, hot rolled {GLO}   market for steel, chromium steel 18/8, hot rolled   Cut-off, U                                             |
|                | Electronics for control units | 5.00                   | Electronics, for control units {GLO}   market for electronics, for control units   Cut-off, U                                                             |
|                | Copper                        | 5.00                   | Copper, cathode {GLO}   market for copper, cathode   Cut-off, U                                                                                           |
|                | Transformer LV                | 40.00                  | Transformer, low voltage use {GLO}   market for transformer, low voltage use   Cut-off, U                                                                 |
|                | Cast iron                     | 109.20                 | Cast iron {GLO}   market for cast iron   Cut-off, U                                                                                                       |
| 105            | Generator                     | 371.50                 |                                                                                                                                                           |
|                | Iron                          | 181.00                 | Cast iron {GLO}   market for cast iron   Cut-off, U                                                                                                       |
|                | Copper                        | 9.00                   | Copper, cathode {GLO}   market for copper, cathode   Cut-off, U                                                                                           |
|                | Magnet                        | 24.20                  | Permanent magnet, for electric motor {GLO}   market for permanent magnet, for electric motor   Cut-off, U                                                 |
|                | Rotor                         | 86.20                  | Reinforcing steel {GLO}   market for reinforcing steel   Cut-off, U                                                                                       |
|                | Stator                        | 71.10                  | Reinforcing steel {GLO}   market for reinforcing steel   Cut-off, U                                                                                       |
| 105            | Rotor                         | 196.00                 |                                                                                                                                                           |
|                | Chromium steel                | 98.00                  | Steel, chromium steel 18/8, hot rolled {GLO}   market for steel, chromium steel 18/8, hot rolled   Cut-off, U                                             |
|                | Cast iron                     | 98.00                  | Cast iron {GLO}   market for cast iron   Cut-off, U                                                                                                       |
| 315            | Blade                         | 65.00                  |                                                                                                                                                           |
|                | Carbon-fiber                  | 5.5                    | Carbon fibre reinforced plastic, injection moulded {GLO}   market for carbon fibre reinforced plastic, injection moulded   Cut-off, U                     |

|  |            |      |                                                                                                                                                          |
|--|------------|------|----------------------------------------------------------------------------------------------------------------------------------------------------------|
|  | Fiberglass | 52   | Glass fibre reinforced plastic, polyamide, injection moulded {GLO}  market for glass fibre reinforced plastic, polyamide, injection moulded   Cut-off, U |
|  | PVC foam   | 4.55 | Polyvinylchloride, bulk polymerised {GLO}  market for polyvinylchloride, bulk polymerised   Cut-off, U                                                   |
|  | Steel      | 3.25 | Reinforcing steel {GLO}  market for reinforcing steel   Cut-off, U                                                                                       |

**Table S3. LCI - Power Transmission**

| Component                                                  | Total Weight (tons) | Process                                                                                                                                                                      |
|------------------------------------------------------------|---------------------|------------------------------------------------------------------------------------------------------------------------------------------------------------------------------|
| Offshore substation                                        | 10,900              |                                                                                                                                                                              |
| Steel                                                      | 10,900              | Steel, chromium steel 18/8 {GLO}  market for steel, chromium steel 18/8   Cut-off, U                                                                                         |
| Inter-array submarine cables                               | 15,400              |                                                                                                                                                                              |
| Copper                                                     | 6,160               | Copper, cathode {GLO}  market for copper, cathode   Cut-off, U                                                                                                               |
| Polyethylene                                               | 4,620               | Polyethylene terephthalate, granulate, amorphous {US}  polyethylene terephthalate, granulate, amorphous, recycled to generic market for amorphous PET granulate   Cut-off, U |
| Polypropylene                                              | 770                 | Polypropylene, granulate {GLO}  market for polypropylene, granulate   Cut-off, U                                                                                             |
| Galvanized steel                                           | 3,850               | Steel, chromium steel 18/8 {GLO}  market for steel, chromium steel 18/8   Cut-off, U                                                                                         |
| Inter-link submarine cables                                | 1,500               |                                                                                                                                                                              |
| Copper                                                     | 675                 | Copper, cathode {GLO}  market for copper, cathode   Cut-off, U                                                                                                               |
| Polyethylene                                               | 375                 | Polyethylene terephthalate, granulate, amorphous {US}  polyethylene terephthalate, granulate, amorphous, recycled to generic market for amorphous PET granulate   Cut-off, U |
| Polypropylene                                              | 75                  | Polypropylene, granulate {GLO}  market for polypropylene, granulate   Cut-off, U                                                                                             |
| Galvanized steel                                           | 375                 | Steel, chromium steel 18/8 {GLO}  market for steel, chromium steel 18/8   Cut-off, U                                                                                         |
| Export HVDC cables (offshore substation to landfall point) | 5,040               |                                                                                                                                                                              |
| Copper                                                     | 2,772               | Copper, cathode {GLO}  market for copper, cathode   Cut-off, U                                                                                                               |
| Polyethylene                                               | 1,260               | Polyethylene terephthalate, granulate, amorphous {US}  polyethylene terephthalate, granulate, amorphous, recycled to generic market for amorphous PET granulate   Cut-off, U |
| Polypropylene                                              | 252                 | Polypropylene, granulate {GLO}  market for polypropylene, granulate   Cut-off, U                                                                                             |
| Galvanized steel                                           | 756                 | Steel, chromium steel 18/8 {GLO}  market for steel, chromium steel 18/8   Cut-off, U                                                                                         |
| Export cables (landfall point to onshore substation)       | 800                 |                                                                                                                                                                              |
| Copper                                                     | 400                 | Copper, cathode {GLO}  market for copper, cathode   Cut-off, U                                                                                                               |
| Polyethylene                                               | 240                 | Polyethylene terephthalate, granulate, amorphous {US}  polyethylene terephthalate, granulate, amorphous, recycled to generic market for amorphous PET granulate   Cut-off, U |
| Polypropylene                                              | 40                  | Polypropylene, granulate {GLO}  market for polypropylene, granulate   Cut-off, U                                                                                             |
| Galvanized steel                                           | 120                 | Steel, chromium steel 18/8 {GLO}  market for steel, chromium steel 18/8   Cut-off, U                                                                                         |

## S2.2. Assembly, transportation, and installation

**Table S4. LCI - Assembly, transportation, and installation**

| Component                     | Amount                  | Process                                                                                                                                |
|-------------------------------|-------------------------|----------------------------------------------------------------------------------------------------------------------------------------|
| Land transformation from      | 219.2 km <sup>2</sup>   | Transformation, from seabed, unspecified                                                                                               |
| Land transformation to        | 219.2 km <sup>2</sup>   | Transformation, to unspecified, used                                                                                                   |
| Land occupation               | 6.58E6 m <sup>2</sup> y | Occupation, seabed, infrastructure                                                                                                     |
| Fuel consumption              | 55,000 ton              | Diesel {GLO}  market group for diesel   Cut-off, U                                                                                     |
| Electricity consumption       | 5,410,534.72 MJ         | PJM electricity generation mix                                                                                                         |
| Natural gas                   | 47.02%                  | Electricity, high voltage {WECC, US only}  electricity production, natural gas, combined cycle power plant   Cut-off, U                |
| Coal                          | 9.64%                   | Electricity, high voltage {WECC, US only}  electricity production, hard coal   Cut-off, U                                              |
| Hydro                         | 1.42%                   | Electricity, high voltage {WECC, US only}  electricity production, hydro, reservoir, alpine region   Cut-off, U                        |
| Nuclear                       | 29.44%                  | Electricity, high voltage {WECC, US only}  electricity production, nuclear, pressure water reactor   Cut-off, U                        |
| Onshore wind                  | 6.33%                   | Electricity, high voltage {WECC, US only}  electricity production, wind, >3MW turbine, onshore   Cut-off, U                            |
| Solar                         | 4.16%                   | Electricity, low voltage {WECC, US only}  electricity production, photovoltaic, 570kWp open ground installation, multi-Si   Cut-off, U |
| Oil                           | 0.32%                   | Electricity, high voltage {WECC, US only}  electricity production, oil   Cut-off, U                                                    |
| Geothermal                    | 0.57%                   | Electricity, high voltage {WECC, US only}  electricity production, deep geothermal   Cut-off, U                                        |
| Other                         | 1.1%                    | Electricity, high voltage {WECC, US only}  electricity production, natural gas, combined cycle power plant   Cut-off, U                |
| Transport – suppliers to NJWP |                         |                                                                                                                                        |
| Transport, freight, sea       | 1.41E8 tkm              | Transport, freight, sea, bulk carrier for dry goods {GLO}  market for transport, freight, sea, bulk carrier for dry goods   Cut-off, U |
| Transport, freight, lorry     | 4.72E4 tkm              | Transport, freight, lorry >32 metric ton, EURO6 {RoW}  market for transport, freight, lorry >32 metric ton, EURO6   Cut-off, U         |
| Fuel consumption              | 58.5 tons               | Diesel {GLO}  market group for diesel   Cut-off, U                                                                                     |
| Transport – NJWP to OSW farm  |                         |                                                                                                                                        |
| Transport, freight, sea       | 8.18E7 tkm              | Transport, freight, sea, bulk carrier for dry goods {GLO}  market for transport, freight, sea, bulk carrier for dry goods   Cut-off, U |
| Fuel consumption              | 38.4 tons               | Diesel {GLO}  market group for diesel   Cut-off, U                                                                                     |

### S2.3. Operation and maintenance

**Table S5. LCI - Operation and maintenance**

| Component               | Amount     | Process                                                                                                                                                                                                                        |
|-------------------------|------------|--------------------------------------------------------------------------------------------------------------------------------------------------------------------------------------------------------------------------------|
| Lubricating oil         | 8.71 ton   | Lubricating oil {RoW}  market for lubricating oil   Cut-off, U                                                                                                                                                                 |
| Transport, freight, sea | 1.22E3 tkm | Transport, freight, sea, tanker for liquid goods other than petroleum and liquefied natural gas {GLO}  market for transport, freight, sea, tanker for liquid goods other than petroleum and liquefied natural gas   Cut-off, U |

### S2.4. Dismantling, transportation, and end-of-life.

**Table S6. LCI – Dismantling, transportation, and end-of-life**

| Component                    | Amount          | Process                                                    |
|------------------------------|-----------------|------------------------------------------------------------|
| Land transformation from     | 219.2 km2       | Transformation, from seabed, infrastructure                |
| Land transformation to       | 219.2 km2       | Transformation, to seabed, unspecified                     |
| Land occupation              | 6.58E6 m2y      | Occupation, sea and ocean                                  |
| Fuel consumption             | 55,000 ton      | Diesel {GLO}  market group for diesel   Cut-off, U         |
| Electricity consumption      | 5,410,534.72 MJ | PJM electricity generation mix (see table 3 for breakdown) |
| Transport – NJWP to OSW farm | 1p              | See table 3 for breakdown                                  |

### S2.5. Conventional and renewable electricity generation sources for comparison analysis

**Table S7. LCI – Conventional and renewable electricity generation sources for comparison analysis**

| Source           | Process                                                                                                                                |
|------------------|----------------------------------------------------------------------------------------------------------------------------------------|
| Coal             | Electricity, high voltage {WECC, US only}  electricity production, hard coal   Cut-off, U                                              |
| Natural gas      | Electricity, high voltage {WECC, US only}  electricity production, natural gas, conventional power plant   Cut-off, U                  |
| Oil              | Electricity, high voltage {WECC, US only}  electricity production, oil   Cut-off, U                                                    |
| Nuclear, PWR     | Electricity, high voltage {WECC, US only}  electricity production, nuclear, pressure water reactor   Cut-off, U                        |
| Nuclear, BWR     | Electricity, high voltage {WECC, US only}  electricity production, nuclear, boiling water reactor   Cut-off, U                         |
| Solar            | Electricity, low voltage {WECC, US only}  electricity production, photovoltaic, 570kWp open ground installation, multi-Si   Cut-off, U |
| Hydro, flow      | Electricity, high voltage {WECC, US only}  electricity production, hydro, run-of-river   Cut-off, U                                    |
| Hydro, reservoir | Electricity, high voltage {WECC, US only}  electricity production, hydro, reservoir, alpine region   Cut-off, U                        |
| Onshore wind     | Electricity, high voltage {WECC, US only}  electricity production, wind, >3MW turbine, onshore   Cut-off, U                            |

### S3. Results

**Table S8 . Midpoint and endpoint combined results – functional unit 1kWh – Offshore Wind Farm**

| Phase                                   |              |          | 1        |                  |          |          |           |                                 |                         |                              |                             |                     | 2                          | 3        | 4                         |
|-----------------------------------------|--------------|----------|----------|------------------|----------|----------|-----------|---------------------------------|-------------------------|------------------------------|-----------------------------|---------------------|----------------------------|----------|---------------------------|
| Impact category                         | Unit         | Total    | Blade    | Tower + Monopile | Rotor    | Nacelle  | Generator | Cables - landfall to substation | Export submarine cables | Inter-array submarine cables | Inter-link submarine cables | Offshore substation | Assembly, transit, install | O&M      | Disassembly, transit, EOL |
| Global warming                          | kg CO2 eq    | 1.27E-02 | 2.14E-03 | 4.68E-03         | 5.33E-04 | 1.40E-03 | 1.19E-03  | 2.78E-05                        | 1.85E-04                | 5.13E-04                     | 5.30E-05                    | 7.97E-04            | 3.64E-04                   | 1.11E-07 | 7.73E-04                  |
| Stratospheric ozone depletion           | kg CFC11 eq  | 4.60E-09 | 1.24E-09 | 1.13E-09         | 1.24E-10 | 4.47E-10 | 4.71E-10  | 2.57E-11                        | 1.76E-10                | 4.17E-10                     | 4.49E-11                    | 2.04E-10            | 8.99E-11                   | 2.72E-14 | 2.30E-10                  |
| Ionizing radiation                      | kBq Co-60 eq | 5.99E-04 | 9.37E-05 | 1.98E-04         | 2.46E-05 | 7.51E-05 | 9.14E-05  | 2.20E-06                        | 1.46E-05                | 3.88E-05                     | 4.00E-06                    | 4.14E-05            | 6.13E-06                   | 3.85E-09 | 9.53E-06                  |
| Ozone formation, Human health           | kg NOx eq    | 3.62E-05 | 4.22E-06 | 1.29E-05         | 1.36E-06 | 4.37E-06 | 3.36E-06  | 2.08E-07                        | 1.43E-06                | 3.41E-06                     | 3.67E-07                    | 2.02E-06            | 1.23E-06                   | 5.45E-10 | 1.39E-06                  |
| Fine particulate matter formation       | kg PM2.5 eq  | 3.75E-05 | 3.05E-06 | 1.00E-05         | 1.62E-06 | 5.59E-06 | 3.05E-06  | 4.02E-07                        | 2.77E-06                | 6.47E-06                     | 7.00E-07                    | 2.84E-06            | 4.65E-07                   | 1.63E-10 | 5.37E-07                  |
| Ozone formation, Terrestrial ecosystems | kg NOx eq    | 3.83E-05 | 4.36E-06 | 1.37E-05         | 1.43E-06 | 4.57E-06 | 3.52E-06  | 2.13E-07                        | 1.46E-06                | 3.50E-06                     | 3.76E-07                    | 2.10E-06            | 1.46E-06                   | 7.29E-10 | 1.62E-06                  |
| Terrestrial acidification               | kg SO2 eq    | 8.11E-05 | 7.07E-06 | 1.86E-05         | 1.83E-06 | 1.04E-05 | 6.80E-06  | 1.21E-06                        | 8.37E-06                | 1.89E-05                     | 2.07E-06                    | 2.99E-06            | 1.31E-06                   | 3.80E-10 | 1.44E-06                  |
| Freshwater ecotoxicity                  | kg 1,4-DCB   | 9.71E-06 | 4.62E-07 | 3.26E-06         | 2.07E-07 | 1.27E-06 | 7.89E-07  | 1.32E-07                        | 9.12E-07                | 2.08E-06                     | 2.26E-07                    | 3.14E-07            | 2.27E-08                   | 2.36E-11 | 5.10E-08                  |
| Marine ecotoxicity                      | kg 1,4-DCB   | 5.00E-06 | 2.51E-07 | 1.93E-07         | 1.53E-08 | 5.23E-08 | 4.33E-06  | 2.60E-09                        | 1.72E-08                | 4.41E-08                     | 4.52E-09                    | 2.36E-08            | 3.19E-08                   | 5.58E-12 | 3.65E-08                  |

|                                 |             |          |          |          |          |          |          |          |          |          |          |          |          |          |          |
|---------------------------------|-------------|----------|----------|----------|----------|----------|----------|----------|----------|----------|----------|----------|----------|----------|----------|
| Human carcinogenic toxicity     | kg 1,4-DCB  | 4.50E-01 | 2.63E-03 | 5.56E-02 | 1.26E-02 | 7.37E-02 | 3.04E-02 | 9.80E-03 | 6.78E-02 | 1.53E-01 | 1.67E-02 | 2.51E-02 | 7.54E-04 | 4.15E-07 | 1.32E-03 |
| Human non-carcinogenic toxicity | kg 1,4-DCB  | 5.09E-03 | 4.54E-05 | 1.03E-03 | 4.04E-05 | 6.80E-04 | 3.35E-04 | 1.06E-04 | 7.34E-04 | 1.64E-03 | 1.79E-04 | 6.74E-05 | 3.40E-06 | 4.11E-09 | 2.30E-04 |
| Land use                        | m2a crop eq | 6.60E-03 | 5.93E-05 | 1.37E-03 | 5.93E-05 | 8.90E-04 | 4.36E-04 | 1.36E-04 | 9.39E-04 | 2.10E-03 | 2.30E-04 | 9.88E-05 | 5.72E-06 | 5.56E-09 | 2.80E-04 |
| Mineral resource scarcity       | kg Cu eq    | 1.15E-02 | 8.01E-05 | 4.97E-03 | 1.01E-03 | 2.50E-03 | 9.43E-04 | 1.91E-05 | 1.27E-04 | 4.18E-04 | 4.28E-05 | 1.34E-03 | 1.33E-05 | 5.75E-09 | 2.40E-05 |
| Fossil resource scarcity        | kg oil eq   | 7.37E-02 | 9.40E-04 | 1.53E-02 | 6.34E-04 | 1.01E-02 | 5.62E-03 | 1.58E-03 | 1.09E-02 | 2.44E-02 | 2.67E-03 | 1.06E-03 | 1.01E-04 | 8.71E-08 | 3.92E-04 |
| Water consumption               | m3          | 4.73E-04 | 3.70E-05 | 1.15E-04 | 1.49E-05 | 5.35E-05 | 1.19E-04 | 3.43E-06 | 2.36E-05 | 5.55E-05 | 5.99E-06 | 2.62E-05 | 9.39E-06 | 2.71E-09 | 1.01E-05 |
| Human health                    | DALY        | 9.04E-08 | 4.45E-09 | 3.06E-08 | 5.00E-09 | 1.54E-08 | 7.44E-09 | 7.02E-10 | 4.83E-09 | 1.15E-08 | 1.24E-09 | 7.23E-09 | 7.00E-10 | 1.23E-09 | 2.46E-13 |
| Ecosystems                      | species.yr  | 7.86E-11 | 9.14E-12 | 2.36E-11 | 2.55E-12 | 9.55E-12 | 7.47E-12 | 6.87E-13 | 4.73E-12 | 1.10E-11 | 1.19E-12 | 3.99E-12 | 1.61E-12 | 3.04E-12 | 5.41E-16 |
| Resources                       | USD2013     | 1.26E-03 | 1.74E-04 | 2.73E-04 | 3.49E-05 | 9.84E-05 | 1.08E-04 | 2.96E-06 | 1.99E-05 | 5.22E-05 | 5.46E-06 | 5.63E-05 | 2.16E-04 | 2.19E-04 | 3.76E-08 |

**Table S9. Midpoint results – functional unit 1 kWh – Comparison Analysis**

| Impact category               | Unit         | OSW      | Coal     | Natural Gas | Oil      | Nuclear, PWR | Nuclear, BWR | Solar    | Hydro, flow | Hydro, reservoir | Onshore wind |
|-------------------------------|--------------|----------|----------|-------------|----------|--------------|--------------|----------|-------------|------------------|--------------|
| Global warming                | kg CO2 eq    | 1.27E-02 | 1.02E+00 | 6.21E-01    | 2.05E+00 | 6.83E-03     | 7.21E-03     | 5.96E-02 | 4.60E-03    | 7.07E-03         | 2.22E-02     |
| Stratospheric ozone depletion | kg CFC11 eq  | 4.60E-09 | 2.81E-07 | 1.18E-07    | 1.00E-06 | 4.04E-09     | 4.42E-09     | 2.17E-08 | 8.68E-10    | 2.76E-09         | 8.22E-09     |
| Ionizing radiation            | kBq Co-60 eq | 5.99E-04 | 3.77E-03 | 2.18E-03    | 4.10E-03 | 6.93E-01     | 7.88E-01     | 4.04E-03 | 1.04E-04    | 2.47E-04         | 8.96E-04     |

|                                         |             |          |          |          |          |          |          |          |          |          |          |
|-----------------------------------------|-------------|----------|----------|----------|----------|----------|----------|----------|----------|----------|----------|
| Ozone formation, Human health           | kg NOx eq   | 3.62E-05 | 2.10E-03 | 5.67E-04 | 6.75E-03 | 3.44E-05 | 3.63E-05 | 1.59E-04 | 1.73E-05 | 2.05E-05 | 7.60E-05 |
| Fine particulate matter formation       | kg PM2.5 eq | 3.75E-05 | 6.69E-04 | 9.83E-05 | 3.83E-03 | 2.71E-05 | 2.84E-05 | 1.22E-04 | 9.30E-06 | 1.04E-05 | 7.30E-05 |
| Ozone formation, Terrestrial ecosystems | kg NOx eq   | 3.83E-05 | 2.12E-03 | 6.64E-04 | 7.01E-03 | 3.55E-05 | 3.75E-05 | 1.68E-04 | 1.79E-05 | 2.12E-05 | 7.96E-05 |
| Terrestrial acidification               | kg SO2 eq   | 8.11E-05 | 2.06E-03 | 2.36E-04 | 1.21E-02 | 3.34E-05 | 3.52E-05 | 2.57E-04 | 1.29E-05 | 1.66E-05 | 1.83E-04 |
| Freshwater eutrophication               | kg P eq     | 9.71E-06 | 6.04E-04 | 1.24E-05 | 2.90E-05 | 4.30E-06 | 4.53E-06 | 3.19E-05 | 1.14E-06 | 1.45E-06 | 2.20E-05 |
| Marine eutrophication                   | kg N eq     | 5.00E-06 | 4.07E-05 | 1.22E-06 | 3.45E-05 | 1.27E-05 | 1.35E-05 | 2.89E-06 | 1.03E-07 | 1.35E-07 | 1.34E-06 |
| Terrestrial ecotoxicity                 | kg 1,4-DCB  | 4.50E-01 | 3.38E-01 | 2.24E-01 | 7.17E+00 | 2.43E-01 | 2.55E-01 | 1.45E+00 | 1.91E-02 | 2.85E-02 | 1.10E+00 |
| Freshwater ecotoxicity                  | kg 1,4-DCB  | 5.09E-03 | 2.15E-02 | 2.73E-03 | 5.29E-03 | 1.12E-03 | 1.17E-03 | 1.26E-02 | 2.24E-04 | 2.12E-04 | 4.55E-02 |
| Marine ecotoxicity                      | kg 1,4-DCB  | 6.60E-03 | 2.96E-02 | 3.60E-03 | 1.24E-02 | 1.57E-03 | 1.64E-03 | 1.65E-02 | 3.02E-04 | 2.97E-04 | 5.55E-02 |
| Human carcinogenic toxicity             | kg 1,4-DCB  | 1.15E-02 | 5.00E-02 | 7.55E-03 | 2.06E-02 | 2.94E-03 | 3.02E-03 | 1.01E-02 | 1.87E-03 | 1.89E-03 | 1.13E-02 |
| Human non-carcinogenic toxicity         | kg 1,4-DCB  | 7.37E-02 | 8.72E-01 | 4.90E-02 | 1.83E-01 | 8.77E-02 | 9.30E-02 | 1.48E-01 | 3.20E-03 | 4.88E-03 | 1.92E-01 |
| Land use                                | m2a crop eq | 4.73E-04 | 1.11E-02 | 2.28E-03 | 1.09E-02 | 2.66E-04 | 2.97E-04 | 2.10E-02 | 2.09E-04 | 8.86E-05 | 1.10E-03 |
| Mineral resource scarcity               | kg Cu eq    | 7.92E-04 | 4.37E-04 | 4.32E-04 | 8.18E-04 | 6.98E-04 | 7.35E-04 | 7.71E-04 | 8.12E-05 | 9.45E-05 | 9.25E-04 |
| Fossil resource scarcity                | kg oil eq   | 3.79E-03 | 2.70E-01 | 2.29E-01 | 5.57E-01 | 1.82E-03 | 1.91E-03 | 1.49E-02 | 9.21E-04 | 1.18E-03 | 5.28E-03 |
| Water consumption                       | m3          | 1.11E-04 | 9.62E-04 | 3.28E-03 | 3.34E-03 | 2.93E-03 | 2.96E-03 | 2.00E-03 | 3.86E-05 | 2.93E-02 | 2.34E-04 |
